# Supplementary material for: The Impact of Theta-Burst Stimulation on Cortical GABA and Glutamate in Treatment-Resistant Depression: A Surface-Based MRSI Analysis Approach
Source: PubMed Central journal article supplement (PMC9328022; doi:10.3389/fnmol.2022.913274), 2022-07-13
Supplement: Data_Sheet_1.pdf [file Data_Sheet_1.pdf]

*Supplementary Material*

**EDIT OFF**

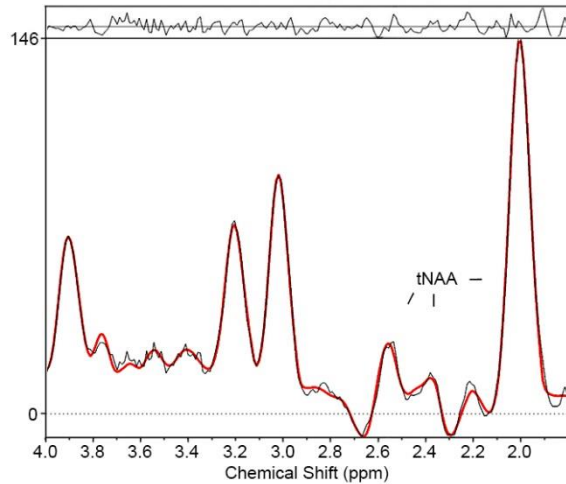

**DIFF**

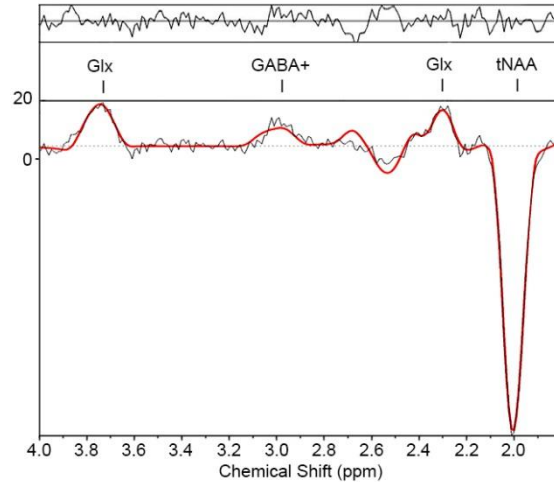

**Supplement figure 1:** Exemplary unedited (EDIT OFF) and edited (DIFF) spectra derived from the caudal middle frontal area showing peaks of total N-acetylaspartate (tNAA), a combination of GABA and macromolecules (=GABA+) and a combined signal of glutamate and glutamine (=Glx).

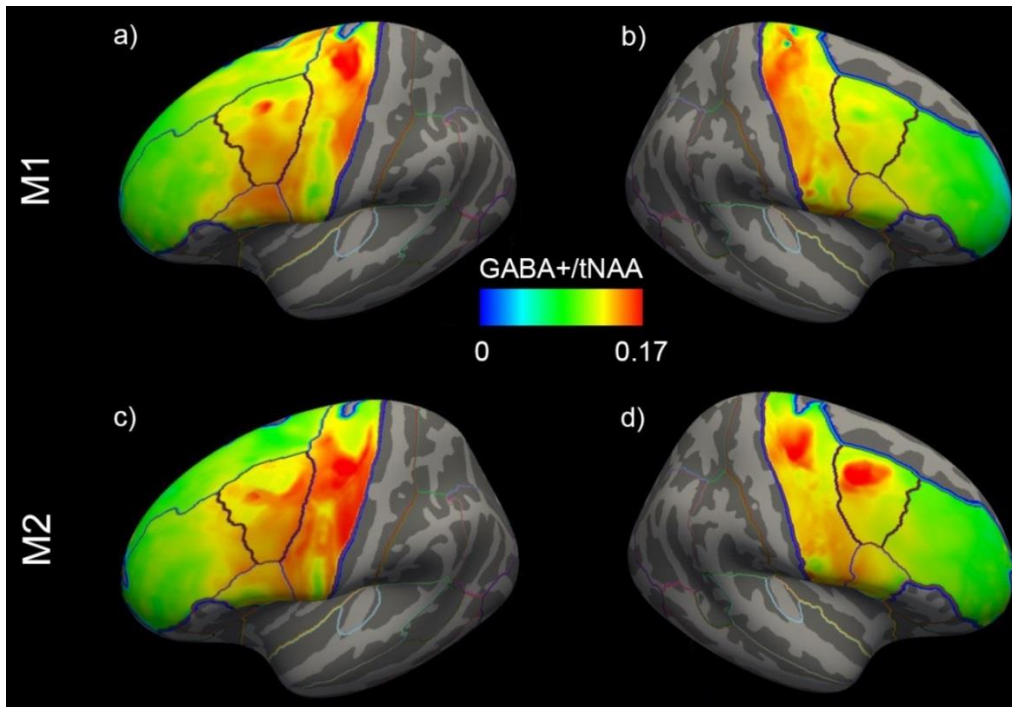

**Supplement figure 2:** Mean distribution of GABA+/tNAA ratios before (=M1) and after (=M2) the treatment period of the left (a and c) and right (b and d) hemisphere. tNAA = total N-acetylaspartate; GABA+ = a combination of GABA and macromolecules.

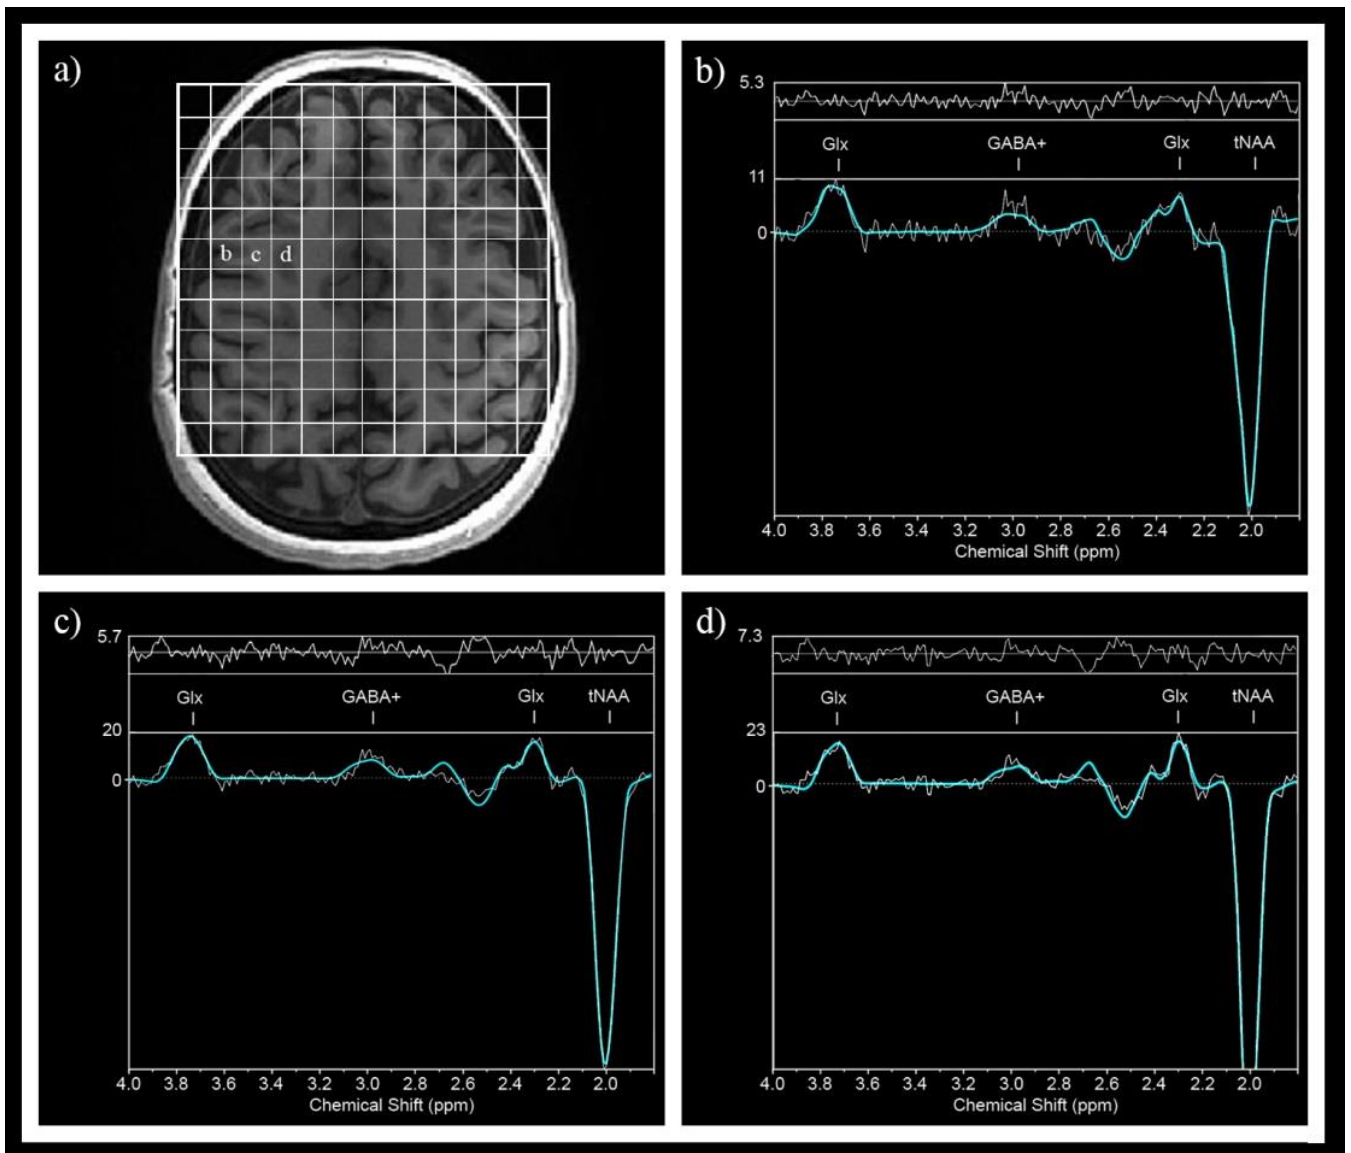

**Supplement figure 3:** Example series of spectra in cortical regions demonstrating the effects of lipid suppression on spectral quality. Stable quantification of skull-near (b) to inner cerebral (c,d) spectra is shown. Voxel positions of spectra (b,c,d) are marked in the voxel grid (a). tNAA = total N-acetylaspartate; GABA+ = a combination of GABA and macromolecules, Glx = glutamate + glutamine.

**Supplement table 1:** Detailed medication of the TRD patients (with dosages in milligram where documented)

| <b>subject</b> | <b>medication</b>                                                                                             |
|----------------|---------------------------------------------------------------------------------------------------------------|
| 1              | sertraline 100mg, pregabalin                                                                                  |
| 2              | venlafaxine 150mg, bupropion 150mg, lamotrigine 100mg, pregabalin 225mg, olanzapine 2.5mg, amitriptyline 20mg |
| 3              | none                                                                                                          |
| 4              | sertraline 200mg, escitalopram 5mg                                                                            |
| 5              | none                                                                                                          |
| 6              | sertraline 100mg                                                                                              |
| 7              | escitalopram 10mg, mianserin 15mg                                                                             |
| 8              | escitalopram 30mg                                                                                             |
| 9              | venlafaxine 150mg, lithium 450mg                                                                              |
| 10             | milnacipran                                                                                                   |
| 11             | melitracen                                                                                                    |
| 12             | none                                                                                                          |
